# Supplementary material for: Azolla A Boon for the Growth of Gift Tilapia, Oreochromis Niloticus (Linnaeus, 1758)
Source: Research Square preprint supplement (doi:10.21203/rs.3.rs-692275/v1), 2021-07-22
Supplement: Supplementary file 1 [file c95db1c80b8d550eca941ad2.docx]

| Table 1 Mean length of different diet trials *in O.niloticus*(cm) | | | | |
| --- | --- | --- | --- | --- |
| Days | **CD** | **D1** | **D2** | **D3** |
| 0 | 0.96±0.2121 | 0.9±0.2578 | 0.915±0.2636 | 0.82 ± 0.2760 |
| 15 | 1.48±0.2627 | 1.34±0.2223 | 1.79±0.308 | 1.16 ± 0.1462 |
| 30 | 2.06±0.4722 | 1.8±0.4006 | 3.345±0.4455 | 1.6 ± 0.248 |
| 45 | 2.91±0.5617 | 2.055±0.3584 | 2.645±0.2992 | 2.35 ± 0.2824 |
| 60 | 3.21±0.4370 | 2.565±0.4706 | 4.015±0.1597 | 3.63 ± 0.341 |
| 75 | 3.815±0.2617 | 3.86±0.5277 | 5.605±0.4806 | 5.4 ± 0.418 |
| 90 | 5.175±0.5128 | 5.03±0.6840 | 6.455±0.4647 | 7.1 ± 0.7255 |

| Table 2 Mean weight of different diet trials *in O.niloticus*(gm) | | | | |
| --- | --- | --- | --- | --- |
| Days | **CD** | **D1** | **D2** | **D3** |
| 0 | 0.395±0.102 | 0.275±0.168 | 0.515±0.1443 | 0.8±0.387 |
| 15 | 0.615±0.364 | 1.155±0.235 | 0.86±0.162 | 2.04±0.273 |
| 30 | 0.87±0.52 | 1.67±0.288 | 1.43±0.305 | 2.37±0.515 |
| 45 | 1.11±0.301 | 2.54±0.376 | 2.06±0.256 | 3.32±0.223 |
| 60 | 1.59±0.381 | 2.895±0.338 | 2.81±0.3605 | 5.41±0.428 |
| 75 | 2.61±0.572 | 3.4±9.316 | 4.1±0.276 | 7.34±0.229 |
| 90 | 3.645±0.306 | 3.965±0.171 | 5.2±0.324 | 9.68±0.373 |
